# Supplementary material for: Alert Cards to improve awareness of an otological emergency
Source: PubMed Central journal article supplement — BMJ Open Qual. 2021 Feb 25;10(1):e000906. doi: 10.1136/bmjoq-2019-000906 (PMC7908913; doi:10.1136/bmjoq-2019-000906), 2021-02-25
Supplement: bmjoq-2019-000906supp001.pdf [file bmjoq-2019-000906supp001.pdf]

# Oxford University Hospitals

NHS Foundation Trust

## NF2

*Oxford Office:*

• *Nurse Line Oxford:*

• *Nurse Line Southampton:*

*Email:*

*Website:* [www.ouh.nhs.uk/nf2](http://www.ouh.nhs.uk/nf2)

NF 2 Unit  
Neuroscience Offices  
Level 3  
**West Wing**  
John Radcliffe Hospital  
Headington  
Oxford  
OX3 9DU

**WE ADVISE URGENT ASSESSMENT OF SUDDEN HEARING LOSS**

**If you notice a significant hearing loss: →**

- Contact the NF2 team Monday - Friday
- **If out of hours** visit your GP or A&E on the same day and take a copy of your latest audiogram.
- Ask them to visit the **OUH NF2 website** and follow the guideline on sudden onset hearing loss.

**We advise:** clinical assessment to differentiate between a conductive loss and a sensorineural loss.  
If sensorineural loss, steroids may be recommended.
